# Supplementary material for: Distal Transverse Arch Dimensions Dictate Long-Term Aortic Arch Gradients following Coarctation of the Aorta Repair during Early Infancy
Source: Research Square preprint supplement (doi:10.21203/rs.3.rs-6156019/v1), 2025-03-11

*Data Supplement for* **Distal Transverse Arch Dimensions Dictate Long-Term Aortic Arch Gradients following Coarctation of the Aorta Repair during Early Infancy**

*Surgical Approach*

Aggressive tissue mobilization of the aortic arch, head and neck vessels, and descending thoracic aorta was obtained regardless of the approach. Sacrifice of the left subclavian artery was routinely performed to obtain a tension-free primary anastomosis greater in diameter than the descending thoracic aorta using only autologous aortic tissue. When indicated, a thoracotomy at the 4th intercostal space was performed. Following heparinization with 100 U/kg, a Satinsky and DeBakey clamp were placed on the PTA and approximately 1 cm distal to the ductal insertion. The undersurface of the distal transverse arch was incised proximally, and the anastomosis was performed with either 6-0 or 7-0 prolene (Figure 1). Infants requiring sternotomy and aortic arch repair during most of the first decade underwent central arterial cannulation in conjunction with deep hypothermic circulatory arrest at 18 °C. Following 2009, a Gore-Tex chimney was sewn to the innominate artery in an end-to-side fashion for arterial cannulation, and antegrade cerebral perfusion was performed between 22-25 °C. During aortic arch repair, most of the DTA was excised, leaving only a cuff of tissue distal to the LCA (Figure 1) and the undersurface of the aortic arch incised toward the ascending aorta.

**Table S1. Operative Mortality following Coarctation repair**

| **Patient** | **Surgical Approach** | **Surgical Procedure** | **Mortality Description** |
| --- | --- | --- | --- |
| **1** | **Sternotomy** | **Arch/VSD** | **NEC** |
| **2** | **Sternotomy** | **ASO/Arch** | **Fungal Sepsis** |
| **3** | **Sternotomy** | **ASO/VSD/Arch** | **PHTN, requiring ECMO** |
| **4** | **Sternotomy** | **ASO/VSD/Arch/Intramural Coronary artery** | **Right Ventricular Dys Fx** |
| **5** | **Thoracotomy** | **CoA +Diaphragmatic Hernia** | **ECMO for hypoxia** |
| **6** | **Thoracotomy** | **CoA** | **Sepsis** |
| **7** | **Thoracotomy** | **CoA** | **Respiratory Arrest** |
| **8** | **Thoracotomy** | **CoA** | **NEC** |

Abbreviations: VSD-Ventricular Septal Defect; NEC-Necrotizing Enterocolitis; ASO-Arterial Switch Operation; PHTN-Pulmonary Hypertension; ECMO-Extracorporeal Membrane Oxygenation; Dys Fx-Dysfunction; CoA-Coarctation of the Aorta.

**Table S2. Propensity Matched Cohort**

|  | Arch Rpr-57 | Thor EEEA-57 | P value |
| --- | --- | --- | --- |
| Age (days) | 13.0 (8.0, 13.0) | 13.0 (9.0, 26.0) | 0.46 |
| Male Gender | 68.4 % (39) | 68.4 % (39) | 0.99 |
| Weight (kg) | 3.4 (2.9, 3.9) | 3.5 (2.9, 4.0) | 0.97 |
|  |  |  |  |
| Z-Scores |  |  |  |
| PTA | -2.5 (-3.3, -1.6) | -2.1 (-2.5, -1.3) | 0.03 |
| DTA | -3.1 (-3.6, -2.3) | -2.9 (-3.5, -2.1) | 0.99 |
| DTA:LCA | 1.0 (0.9, 1.2) | 1.1 (0.9, 1.4) | 0.08 |
|  |  |  |  |
| Post-Operative Data |  |  |  |
| Vent Duration (days) | 4.0 (2.0, 7.0) | 2.0 (1.0, 4.0) | 0.08 |
| Vent > 7 days | 19.3 % (11) | 5.3 % (3) | 0.04 |
| LOS (days) | 17.0 (14.0, 21.0) | 8.0 (6.0, 12.0) | 0.01 |
| Mortality | 1.8 % (1) | 5.3 % (3) | 0.64 |
| Discharge Arch Grad (mmHg) | 11.6 (9.0, 16.0) | 16.0 (10.2, 23.0) | 0.012 |

Abbreviations: PTA-Proximal Transverse Arch, DTA-Distal Transverse Arch, LCA-Left Carotid Artery, Vent-Ventilation, LOS-Length of Stay

**Table S3. Re-Intervention Data**

|  | Baseline |  |  |  | ReINT |  |  |  |  |
| --- | --- | --- | --- | --- | --- | --- | --- | --- | --- |
|  | PTA Z-score | DTA Z-score | Surg App | Surg Factors | Time (years) | Gradient (mmHg) | FU (years) | FU Grad | Surg Int |
| 1 | -2.3 | -2.8 | Stern | Large vertebral branch and Left subclavian not sacrificed | 0.41 | 73 | 11.2 | 16 | No |
| 2 | CTO | -3.95 | Stern | RAA, Aberrant R sub, long DTA hypoplastic segment | 0.75 | 92 | 11.1 | 31 | No |
| 3 | -1.45 | -3.17 | Thor | Shock, no PDA | 4.9 | 70.5 | 21.2 | 31 | Yes |
| 4 | -1.45 | -3.53 | Thor | Shock | 0.41 | 33.6 | 17.2 | 16 | No |
| 5 | -1.1 | -1.9 | Thor | Sepsis, abn Neuro Exam | 0.52 | 64 | 8.8 | 16 | No |

Abbreviations: ReINT-Re-Intervention, Surg App-Surgical Approach, Stern-Sternotomy, Thor-Thoracotomy, RAA-Right Aortic Arch, R Sub-Right Subclavian, DTA-Distal Transverse Arch, PDA-Patent Ductus Arteriosus, LV Fx-Left Ventricular Function, abn-Abnormal.

**Table S4. Follow-up Data**

|  | Stern-118 | Thor-112 | P value |
| --- | --- | --- | --- |
| Follow-up (years) | 7.4 (4.7, 11.5) | 9.4 (3.5, 14.9) | 0.39 |
| Weight (kg) | 26.2 (17.3, 47.3) | 29.0 (18.0, 162.0) | 0.39 |
| Height (cm) | 126.0 (106.3, 151.0) | 129.5 (104.8, 162.0) | 0.38 |
| BSA (m2) | 0.97 (0.72, 1.40) | 1.05 (0.72, 1.57) | 0.47 |
|  |  |  |  |
| SBP (mmHg) | 104.0 (97.0, 114.0) | 108.0 (100, 119.0) | 0.17 |
| LVMI (g/m2) | 67.4 (57.0, 81.0) | 69.7 (54.7, 81.3) | 0.86 |
| Diastolic Tail on echo | 1.7 % (2) | 3.6 % (4) | 0.68 |
| Currently on Anti-HTN Medication | 0 | 1.8 % (2) | 0.23 |

Abbreviations: BSA- Body Surface Area, SBP-Systolic Blood Pressure, LVMI-Left Ventricular Mass Index, HTN-Hypertensive

**Figure Legends:**

Figure S1-Flow diagram of infants repaired using a thoracotomy or sternotomy. Abbreviations: Obs-Obstruction, FU Grad-Follow-up Gradient

Figure S2- Freedom from re-intervention (Re-Int) between infants repaired using a Sternotomy (Stern) and aortic arch repair vs. Thoracotomy (Thor) and Extended End to End Anastomosis.


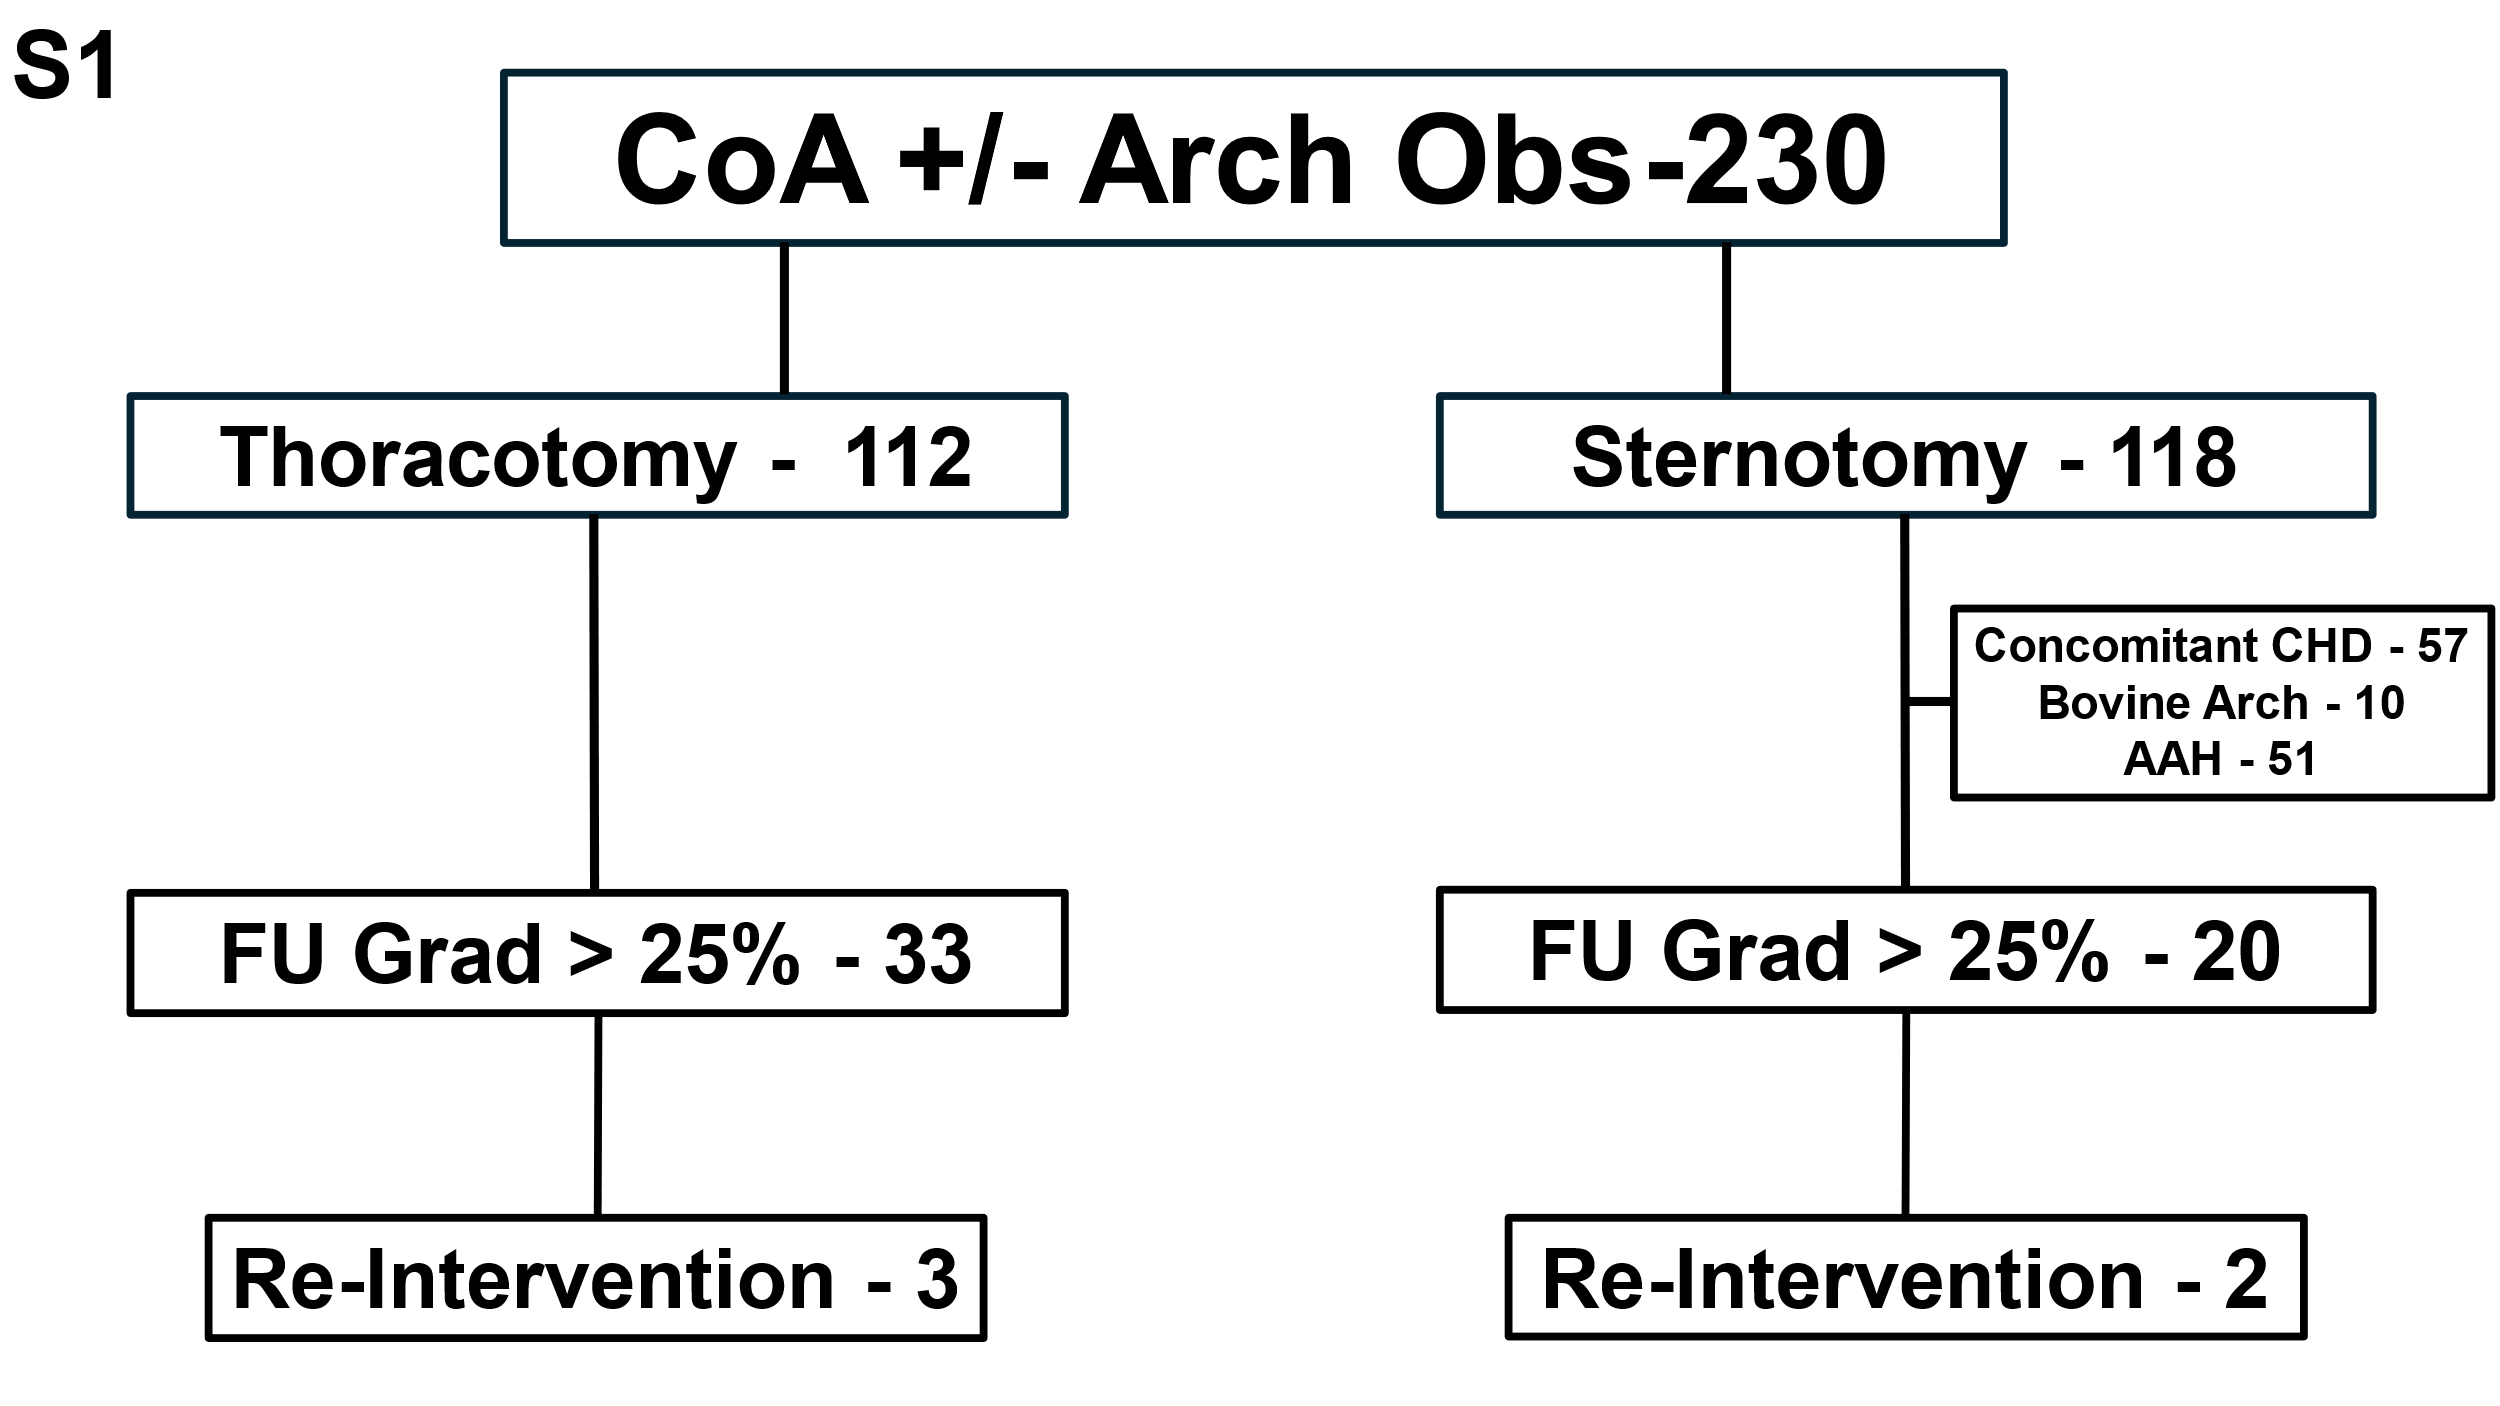


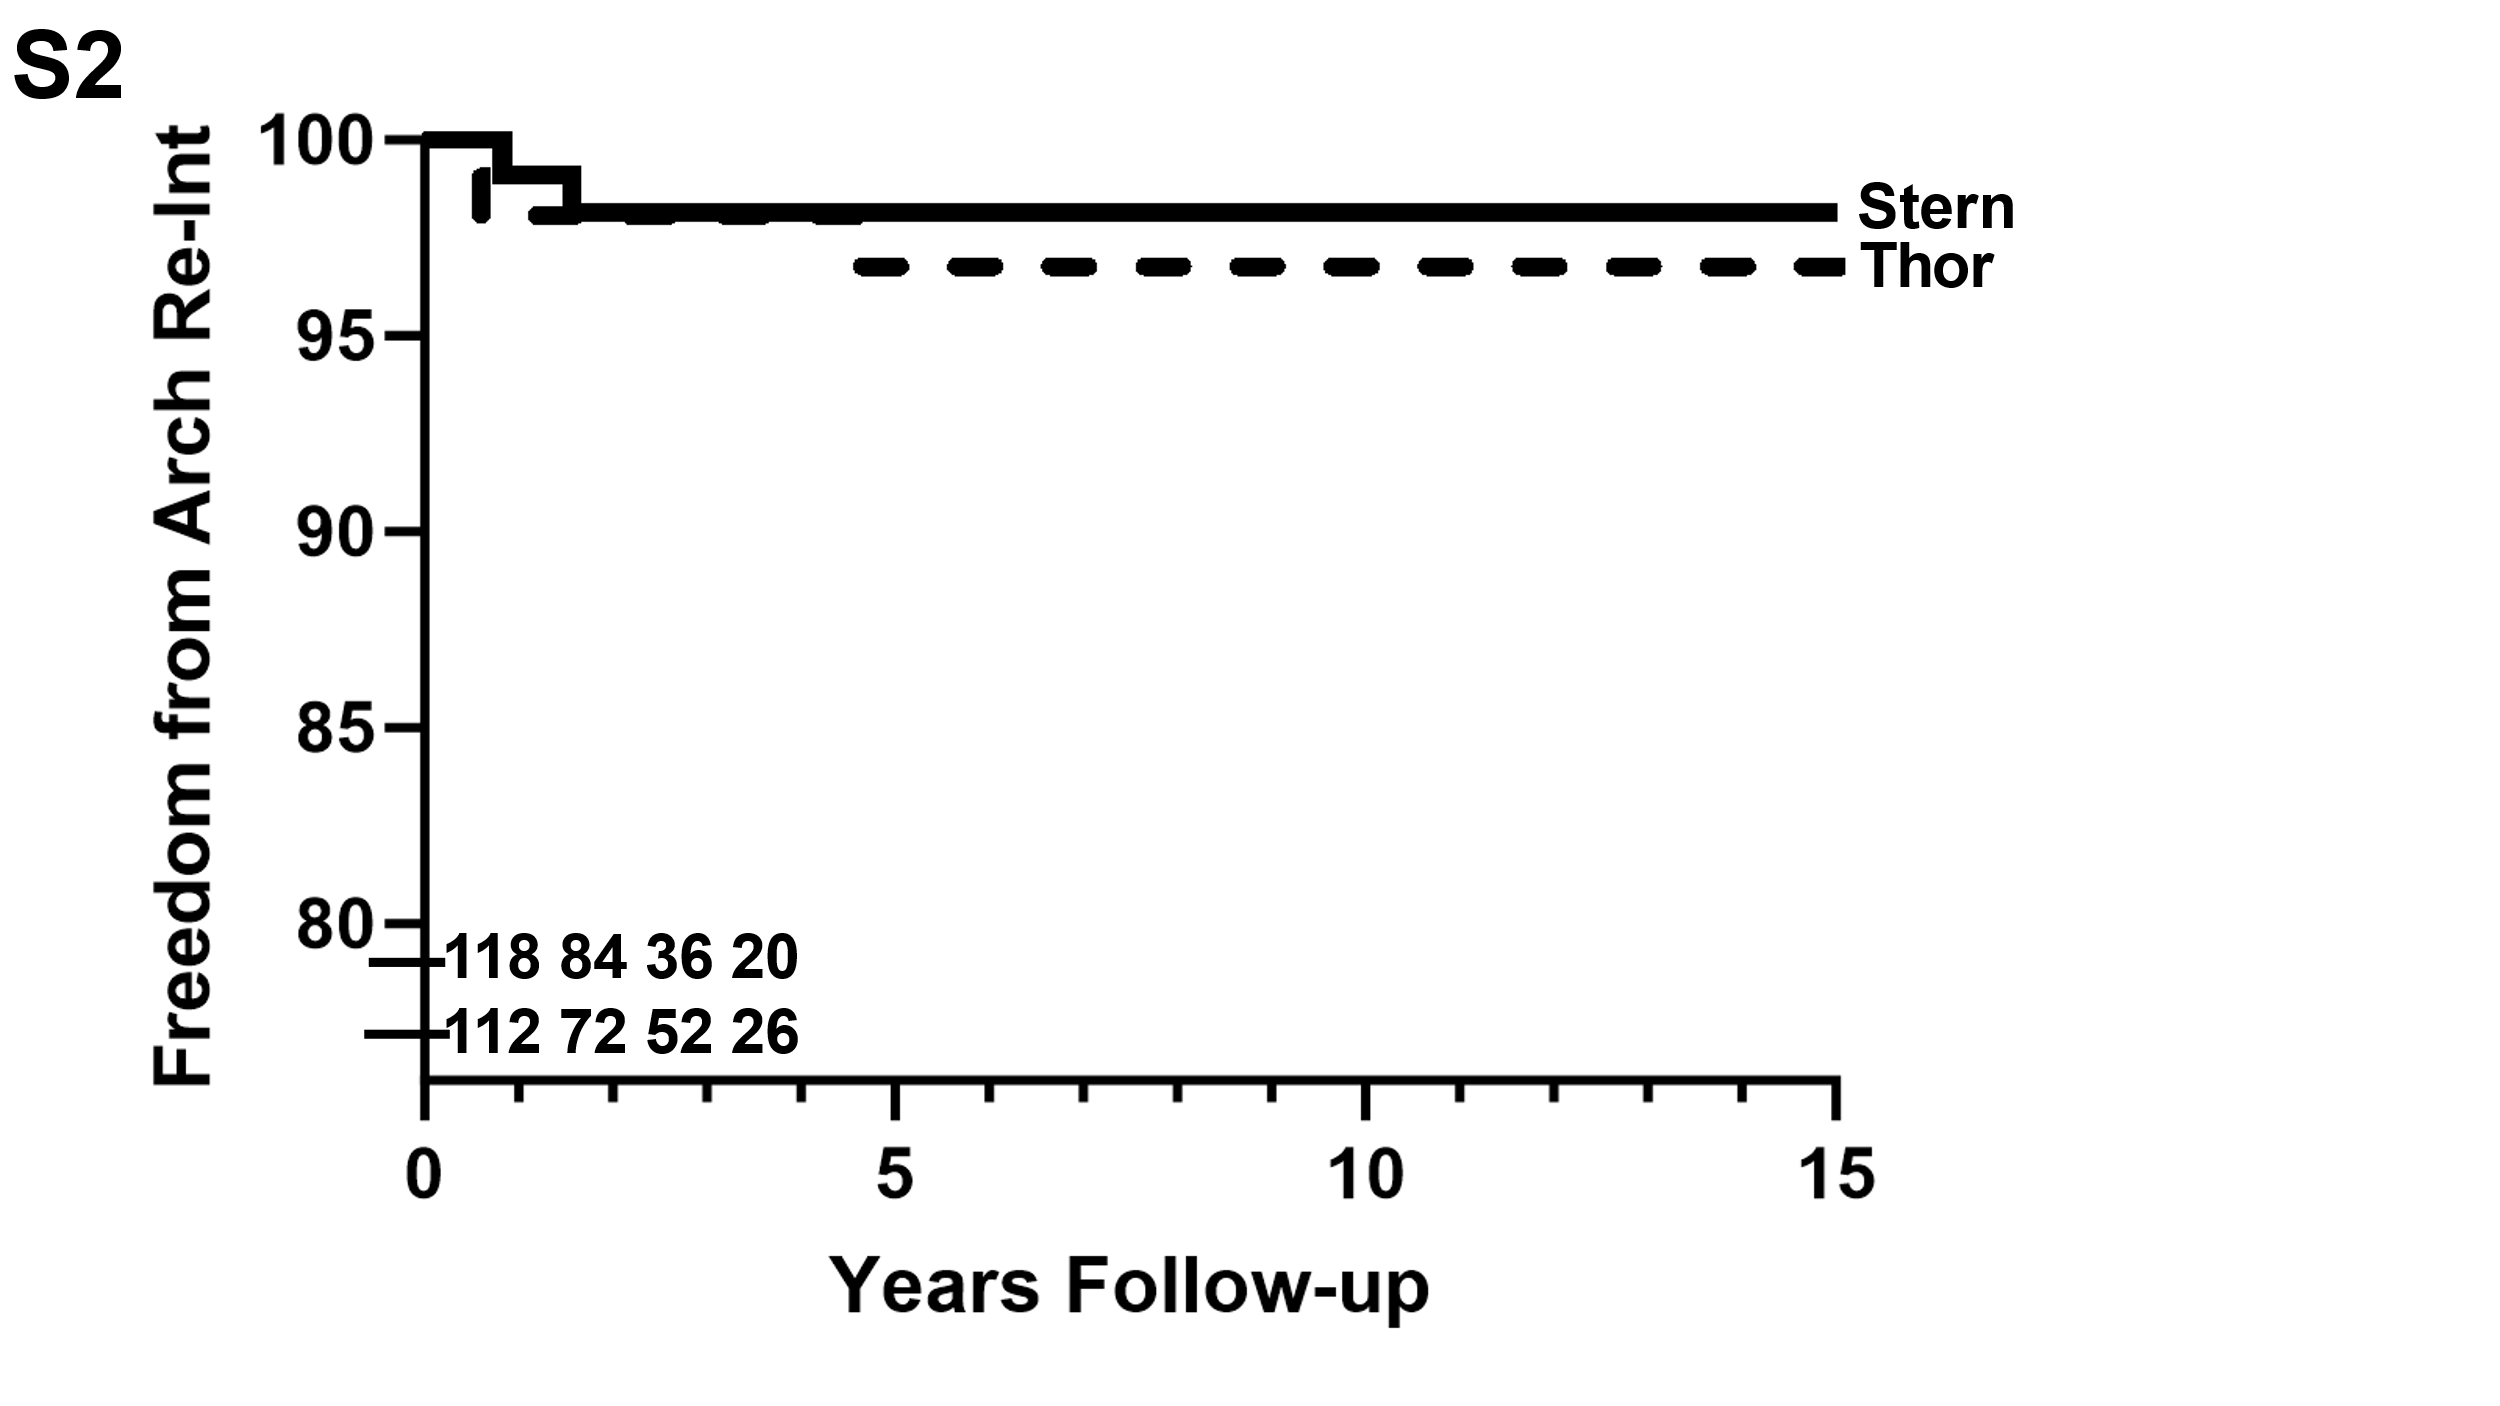

Supplement: Supplementary file 1 [file afed82bfc2b0704880c8a994.docx]
